1 **Title:** High School Sports During the CoVID-19 Pandemic: The Impact of Sport Participation on  
2 the Health of Adolescents

3

4

5

6

7

8 Timothy A. McGuine PhD, ATC, Kevin Biese MA, ATC, Scott J. Hetzel MS, Allison Schwarz BS,  
9 Claudia L. Reardon MD, David R. Bell PhD, ATC, M. Alison Brooks MD MPH and Andrew M.  
10 Watson MD, MS

11

12 **Affiliations:** This work was performed at the University of Wisconsin-Madison

13

14 **Corresponding author:** Tim McGuine, University of Wisconsin School of Medicine and Public  
15 Health, 1685 Highland Avenue, Madison, WI 53705-2281, [mcguine@ortho.wisc.edu](mailto:mcguine@ortho.wisc.edu)

16

17 **Conflict of Interest Disclosures (includes financial disclosures):** The authors have no  
18 conflicts of interest to disclose.

19

20 **Funding:** No additional funding was secured for this study.

21

22

23 **ABSTRACT**

24 **Context:** During the fall of 2020, some high schools across the US allowed their students to  
25 participate in interscholastic sports while others cancelled or postponed their sport programs  
26 due to concerns regarding CoVID19 transmission. It is unknown what effect this has had on the  
27 physical and mental health of student athletes.

28 **Objective:** Identify the impact of playing a sport during the CoVID19 pandemic on the health of  
29 student athletes.

30 **Design:** Cross-sectional study.

31 **Setting:** Sample recruited via email.

32 **Patients or Other Participants:** 559 Wisconsin high school athletes (age=15.7±1.2 yrs.,  
33 female=44%) from 44 high schools completed an online survey in October 2020. A total  
34 of 171 (31%) athletes played (PLY) a fall sport, while 388 (69%) did not play (DNP).

35 **Main Outcome Measure(s):** Demographics included: sex, grade and sports played.  
36 Assessments included the General Anxiety Disorder-7 Item (GAD-7) for anxiety, Patient Health  
37 Questionnaire-9 Item (PHQ-9) for depression, the Pediatric Functional Activity Brief Scale  
38 (PFABS) for physical activity, and the Pediatric Quality of Life Inventory 4.0 (PedsQL) for quality  
39 of life. Univariable comparisons between the two groups were made via t-tests or chi-square  
40 tests. Means for each continuous outcome measure were compared between the groups by  
41 ANOVA models that controlled for Age, Sex, Teaching method (Virtual, Hybrid, or In-person),  
42 and the % of students eligible for free lunch.

43 **RESULTS:** PLY group participants were less likely to report moderate to severe symptoms of  
44 anxiety (PLY=6.6%, DNP=44.1%,  $p < 0.001$ ) and depression (PLY=18.2%, DNP=40.4%,  
45  $p < 0.001$ ). PLY athletes reported higher (better) PFABS scores (mean: [95%CI]),  
46 (PLY=23.2[22.0,24.5], DNP=16.4[15.0,17.8],  $p < 0.001$ ) and higher (better) PedsQL total scores  
47 (PLY=88.4[85.9,90.9], DNP=79.6[76.8,82.4],  $p < 0.001$ ).

48 **CONCLUSIONS:** Adolescent athletes who played a sport during the CoVID19 pandemic  
49 reported fewer symptoms of anxiety and depression, as well as higher physical activity and  
50 quality of life scores compared to adolescent athletes who did not play a sport.

51

52 **Key words:** Public health, CoVID-19, Youth, Depression

53 **Abstract word count:** 300

54 **Manuscript word count:** 3931

55

56 **Key points:**

57 **1)** High school students who played a sport during the CoVID-19 pandemic in the fall of  
58 2020 were less likely to report anxiety and depression symptoms than athletes who did  
59 not play a sport.

60 **2)** High school students who played a sport during the CoVID-19 pandemic in the fall of  
61 2020 reported higher physical activity and quality of life scores compared to high school  
62 athletes who did not play a sport.

63 **3)** Participation in high school sports may have significant physical and mental health  
64 benefits for US adolescent athletes during the CoVID-19 pandemic.

65

66

## 67 INTRODUCTION

68 An estimated 8.4 million US high school students participate in interscholastic athletics  
69 each year.<sup>1</sup> Adolescent sport participation is recognized to have profound positive influences on  
70 the health and well-being of adolescent students as evidenced by higher academic  
71 achievement, greater levels of physical activity and decreased levels of anxiety and depression  
72 compared to students who do not participate in athletics.<sup>2-6</sup> Additionally, research has shown  
73 that high school sport participation is one of the most important factors for life-long physical  
74 activity and health.<sup>7-12</sup>

75 During the spring of 2020, CoVID-19, the disease caused by the novel SARS-CoV-2  
76 coronavirus, reached pandemic levels in the US. Schools were closed and high school sports  
77 were cancelled to slow the spread of the disease. Experts have suggested that while necessary  
78 to slow the community spread of the virus, the CoVID-19 mitigation strategies may nonetheless  
79 have profound mental and physical health consequences for students.<sup>13-18</sup> For example, experts  
80 have indicated that the CoVID-19 pandemic will make it more likely that youth will engage in  
81 sedentary activities and increase the prevalence of childhood obesity.<sup>19-23</sup>

82 Research has also shown that females, older athletes, team sport participants and  
83 athletes from areas with higher levels of poverty reported more symptoms of anxiety and  
84 depression, as well as lower levels of physical activity and health related quality of life (HRQoL)  
85 in May 2020 during the widespread shutdown.<sup>24</sup> Another study reported that adolescent  
86 athletes in May 2020 reported more mental health symptoms, as well as lower physical activity  
87 and HRQoL scores compared to similar samples of adolescent athletes prior to the CoVID-19  
88 pandemic.<sup>25</sup>

89 During summer 2020, school districts across the US made determinations regarding  
90 whether to allow interscholastic sports to resume based on input from various health and sport  
91 associations while recognizing that various sports would possibly pose varying risks for the  
92 transmission of CoVID-19 depending on the nature of the sport.<sup>26-28</sup> During fall 2020, fourteen

93 states in the US (27%) allowed full fall sport participation, and 30 states (60%) allowed modified  
94 sport participation, with the remaining 6 states and the District of Columbia (13%) not allowing  
95 any interscholastic athletic participation.<sup>29</sup> In addition, within each state that allowed full or  
96 modified participation, individual school districts were allowed to determine which sports they  
97 offered. Some schools allowed all their fall sports, while other districts sponsored a portion of  
98 their sports while postponing or cancelling other sports.<sup>29</sup>

99 A drawback to the recent studies regarding the impact of CoVID-19 on the health of  
100 adolescent athletes is the difficulty discerning if the health changes reported were primarily due  
101 to restrictions on sport participation or due to other factors such as the lack of in-person school  
102 attendance, the increased economic uncertainty or concerns about contracting the SARS-CoV-2  
103 coronavirus. There is a need, therefore, to determine if sport participation independently affects  
104 the health of adolescent athletes during the CoVID-19 pandemic.

105 We are not aware of research to date that has specifically documented how sport  
106 participation during the CoVID-19 pandemic affects the mental and physical health of  
107 adolescent athletes. This information may assist sports medicine providers, school  
108 administrators and health care policy experts with implementing strategies to improve the short-  
109 term and long-term mental and physical health of adolescent athletes in the months and years  
110 to come as we transition from the CoVID-19 pandemic.<sup>30,31</sup> Therefore, the purpose of this study  
111 was to measure the impact of sport participation on the mental and physical health of  
112 adolescent athletes during the CoVID-19 pandemic. To measure this impact, we compared  
113 self-report data on anxiety, depression, physical activity and HRQoL for a cohort of athletes who  
114 played a sport with a similar cohort of athletes who did not play a sport in Wisconsin during fall  
115 2020. We hypothesize that adolescent student athletes who played a sport will report  
116 significantly better mental health, physical activity and HRQoL than athletes who did not play a  
117 sport.

118

119 **METHODS**

120 This study was approved by the University of Wisconsin Health Sciences Institutional Review  
121 Board in September 2020.

122 Wisconsin allowed individual school districts to determine whether to sponsor  
123 interscholastic teams during the fall of 2020.<sup>32</sup> The traditional fall sports (prior to the CoVID-19  
124 pandemic) offered in Wisconsin high schools included cross country, football, volleyball (boys  
125 and girls), golf (girls), swim (boys and girls), tennis (girls), and soccer (boys). Approximately  
126 305 (60%) of the 510 schools opted to sponsor teams for all fall sports, while 104 (20%) opted  
127 to offer a limited number of sports, and the remaining 101 (20%) offered no fall sports at their  
128 schools.

129 The sports offered most often by schools included boys' and girls' cross country (78%)  
130 and girls' golf (72%). The sports offered least often included football (54%), boys' soccer (50%)  
131 and girls' swimming (50%).<sup>33</sup>

132 Wisconsin high school athletes (male and female, grade: 9–12, age: 13-19) were  
133 recruited to participate in the study by completing an anonymous online survey in October 2020.  
134 Emails were sent to athletic trainers and coaches from 44 schools to solicit their athletes to  
135 participate in the study. The survey included 69 items and included a section to solicit  
136 demographic information, followed by 3 validated instruments used to measure physical activity,  
137 mental health and HRQoL in adolescents. Demographic responses regarding the participant's  
138 age, grade and school name, as well as any high school sport in which they competed during  
139 the fall and planned to compete in if the sport was offered by the school during the winter and  
140 spring of the 2020/21 school year were collected. The remainder of the survey consisted of an  
141 assessment of mental health, physical activity level and HRQoL.

142 **Mental health**

143 The General Anxiety Disorder-7 Item (GAD-7) and Patient Health Questionnaire-9 Item  
144 (PHQ-9) surveys were used to evaluate anxiety and depression symptoms,

145 respectively.<sup>34</sup> The questionnaires ask participants to rate the frequency of anxiety or  
146 depression symptoms experienced in the past two weeks. The GAD-7 scale is a valid,  
147 reliable and sensitive measure of anxiety symptoms and is able to differentiate between  
148 mild and moderate GAD in adolescents.<sup>35</sup> Scores range from 0-21 with a higher score  
149 indicating increased anxiety. In addition to the total score, GAD-7 categorical scores of 0–  
150 4, 5-9, 10–14, and 15–21 correspond to no, mild, moderate, and severe anxiety  
151 symptoms, respectively.<sup>36</sup> The PHQ-9 is a 9-item screening questionnaire for depression  
152 symptoms with scores ranging from 0-27 with a higher score indicating a greater level of  
153 depression. The PHQ-9 has demonstrated high sensitivity and specificity for depression  
154 screening in adolescent patients aged 13 to 17 years.<sup>37</sup> In addition to the total score,  
155 PHQ-9 categorical scores of 0–4, 5–9, 10–14, 15–19 and  $\geq 20$  correspond to minimal or  
156 none, mild, moderate, moderately severe and severe depression symptoms,  
157 respectively.<sup>38</sup>

### 158 **Physical Activity**

159 Physical activity level was assessed with the Hospital for Special Surgery Pediatric  
160 Functional Activity Brief Scale (PFABS). This validated 8-item instrument was designed to  
161 measure the activity of active children between 10 and 18 years old for the past month.  
162 Scores range from 0 to 30 with a higher score indicating greater physical activity.<sup>39,40</sup>

### 163 **Health Related Quality of Life**

164 HRQoL was measured with Pediatric Quality of Life Inventory 4.0 (PedsQL). The 23-item  
165 PedsQL questionnaire assesses HRQoL for the previous 7 days. A physical summary score  
166 (physical function) and psychosocial (a combination of emotional, social and school function)  
167 summary score, as well as the total PedsQL scores can be calculated, with scores ranging from  
168 0 to 100 and a higher score indicating greater HRQoL. The PedsQL has been validated for use  
169 in children ages 2 to 18.<sup>41,42</sup>

### 170 **Statistical analyses**

171 Statistical analyses were performed for participants who provided a valid, complete survey.  
172 Participants were excluded if they did not complete the entire survey, were not in grades 9 -12,  
173 or indicated they did not plan to play interscholastic sports at their school. Participants'  
174 demographic variables were summarized (mean [SD] or N [%]) overall and by study participants  
175 for sex and fall sport participation. Participants were classified as playing a fall sport (PLY) or  
176 as not playing a fall sport (DNP).

177 The characteristics for the schools attended by the participants included the type of  
178 instructional delivery method and the % of students eligible for free or reduced lunch. The type  
179 of instructional delivery method (online only, in person or hybrid [a combination of in person and  
180 online]) was determined by reviewing information on each school's website. The % of the  
181 students eligible for free or reduced lunch for each school was obtained from the publicly  
182 available data available online through the Wisconsin Department of Public Instruction.<sup>43</sup>

183 Means (mean, [95%CI]) for each continuous outcome measure were reported and  
184 compared between fall sport participation groups by ANOVA models that controlled for age, sex,  
185 type of teaching method and % of students who were eligible for free or reduced lunch. Ordinal  
186 logistic regression models were used to estimate the percentages of level of depression (PHQ-  
187 9) and anxiety (GAD-7) by group. These models controlled for the same covariates listed  
188 above. All tests had a 0.05 significance level. Analyses were conducted in R for statistical  
189 computing version 3.5.

190

## 191 **RESULTS**

192 A total of 559 high school athletes (age = 15.7±1.2 yrs., female = 43.6%, male = 56.4%)  
193 completed the survey. Due to the convenience sampling design, information regarding the  
194 response rate was unavailable. Three hundred eighty-eight (69.4%) participants reported they  
195 did not play (DNP) an interscholastic sport at their school, while 171 (30.6%) reported they did  
196 play (PLY) an interscholastic sport. The majority (n = 257, 66.2%) of the participants in the



197 DNP group attended schools that cancelled all fall sports, and 91.4% (n = 355) attended  
198 schools that delivered all instruction online. The % of students eligible for free or reduced lunch  
199 (mean  $\pm$  SD) for the schools was  $25.9 \pm 10.3\%$ . One hundred forty-eight (86.5%) of the  
200 participants in the PLY group attended schools that offered all fall sports, with 40.3% (n = 69)  
201 attending school in-person. Participants in the PLY group were most likely to report playing  
202 volleyball (n = 66, 38.6%), football (n = 53, 31%) and boys' soccer (n = 22, 12.9%). Participants  
203 in the DNP group most commonly reported that they had intended to play football (n = 160,  
204 41.2%), and volleyball (n = 51, 13.1%). Seventy nine participants (20.4%) did not play a fall  
205 sport but intended to play a high school winter or spring sport. A summary of the participant  
206 characteristics is found in Table 1.

### 207 **Mental Health**

208 The PLY participants were more likely to report GAD-7 symptom scores of 0 to 4, indicating no  
209 or minimal anxiety (PLY = 80.1% vs DNP = 26.4%), whereas the DNP athletes were more likely  
210 to report scores of 10 to 21, indicating more moderate to severe anxiety than the PLY group  
211 (DNP = 44.1% vs PLY = 6.6%) as shown in Figure 1. The PLY participants were more likely to  
212 report PHQ-9 scores 0 to 4, indicating no or minimal depression (PLY = 57.7% vs DNP =  
213 31.3%), whereas the DNP athletes were more likely to report scores of 10 to 27, indicating more  
214 moderate to severe depression than the PLY group (DNP = 40.1% vs PLY = 18.2%) as shown  
215 in Figure 2. The DNP group reported a higher (worse) GAD-7 score (mean, [95%CI]) than the  
216 PLY group (8.4 [7.2, 9.5] vs. 3.2 [2.2, 4.3], < 0.001) as well as a higher (worse) PHQ-9 score  
217 than the PLY group (7.6 [6.4, 8.8] vs. 3.9 [2.8, 4.9], < 0.001). The total GAD-7 and PHQ-9  
218 scores for both groups are found in Table 2.

### 219 **Physical Activity and HRQoL**

220 Physical activity, as measured by PFABS scores (mean, [95%CI]) for the PLY group were 41%  
221 higher (better) than the DNP group (PLY = 23.2 [22.0, 24.5] vs. DNP = 16.4 [15.0, 17.8], p <  
222 0.001). The PFABS scores for both groups are found in Table 2. The HRQoL for athletes in the

223 PLY group was higher (better) than the DNP athletes. Specifically, the PedsQL physical health  
224 summary scores for the PLY group were higher than the DNP group (PLY = 92.3 [90.1, 94.4] vs.  
225 DNP = 86.5 [84.1, 88.9],  $p = 0.004$ ), as was the psychosocial health summary score (PLY =  
226 86.4 [83.3, 89.4] vs. DNP = 75.9 [72.5, 79.3],  $p < 0.001$ ) and the total PedsQL score (PLY =  
227 88.4 [85.9, 90.9] vs. DNP = 79.6 [76.8, 82.4],  $p < 0.001$ ). The PedsQL scores for both the PLY  
228 and DNP groups are found in Table 2.

229

## 230 **DISCUSSION**

231 To our knowledge, this is the first study to compare the mental health status, physical activity  
232 level and HRQoL between high school athletes who were or were not able to participate in  
233 interscholastic sports during the CoVID-19 pandemic. This study builds on prior research  
234 demonstrating the dramatic changes in physical and mental health following the cancellation of  
235 high school sports in the spring of 2020.<sup>24,25</sup> A limitation of the prior studies is the difficulty  
236 discerning if the health changes reported were primarily due to the restrictions on sport  
237 participation or the result of other factors such as sex, age, socioeconomic status or the lack of  
238 in-person school attendance. After controlling for grade, sex, school instructional delivery  
239 method and the % of students qualifying for free and reduced lunch, our findings demonstrate  
240 that athletes who did not play interscholastic sports experienced significantly worse symptoms  
241 of anxiety and depression, lower levels of physical activity and worse HRQoL compared to  
242 athletes who did not play sports in fall 2020. This suggests that the re-initiation of sport  
243 participation may result in significant improvements in mental and physical health for  
244 adolescents during the CoVID-19 pandemic.

245

### 246 **Mental Health**

247 Athletes that played high school sports in the fall of 2020 demonstrated significantly lower  
248 symptoms of anxiety and depression than those athletes who did not play a sport. Specifically,

249 athletes in the DNP group were more than 6 times as likely to report moderate to severe  
250 symptoms of anxiety and more than twice as likely to report moderate to severe symptoms of  
251 depression even after adjusting for age, sex, type of school instruction and % of the students  
252 qualifying for free and reduced lunch. This seems to suggest that while PLY athletes continue  
253 to demonstrate slightly higher levels of depression and anxiety than historical values, the mental  
254 health burden among DNP athletes is considerably worse.<sup>25</sup> In fact, the DNP group  
255 demonstrates levels of moderate to severe anxiety and depression symptoms similar to those  
256 identified in a nationwide sample for adolescent athletes in May 2020 (anxiety = 36.7%,  
257 depression = 27.1%).<sup>25</sup> Given the adolescent mental health crisis that existed prior to the onset  
258 of CoVID-19, and the known mental health benefits of sport participation, this data seems to  
259 suggest that adolescent athletes who are unable to return to sports may be at a significantly  
260 greater risk for mental health issues.

261 Experts have pointed out that the CoVID-19 pandemic has negatively impacted the  
262 mental health of youth and may be related to decreased socialization, increased family strain,  
263 and reduced access to support services.<sup>13,44</sup> As such, we recognize that factors beyond sport  
264 participation such as the ability to attend school in-person may contribute to adolescent mental  
265 health. In addition, depression and anxiety in adolescent athletes have been shown to be  
266 related to sex and grade in school. Nonetheless, after controlling for the type of school  
267 instructional delivery (online, in-person or hybrid), age and sex, sport participation remained  
268 significantly associated with large improvements in anxiety and depression symptoms.  
269 Therefore, we can reasonably assume that the increased symptoms we identified among the  
270 DNP participants are at least partly attributable to the lack of sport participation.

271 Our results also support previous research that has demonstrated that sport participation  
272 improves the mental health of youth and adolescents.<sup>45-48</sup> A recent study during the early stages  
273 of the CoVID-19 pandemic found that 11.4% of student athletes who were unable to participate  
274 in sports reported moderate to severe levels of depression symptoms, which was four times

275 higher than the rate (2.8%) reported by student athletes prior to the CoVID-19 pandemic.<sup>25</sup> This  
276 supports the premise that sport participation may represent an important mechanism to improve  
277 the mental health of adolescents as society continues to attempt to mitigate the impact of  
278 CoVID-19 in the months and years to come.

### 279 **Physical Activity**

280 Our study demonstrates that during the CoVID-19 pandemic, high school athletes who  
281 played high school sports had a significantly higher level of physical activity than athletes who  
282 did not play a sport. Notably, the total PFABS score for the PLY group was similar to scores  
283 (mean, [95%CI]) for healthy high school aged athletes prior to CoVID-19 (24.7 [24.5,24.9]).<sup>25</sup>  
284 Similarly, the PFABS scores for the PLY group were similar to scores for adolescents reported  
285 by Donovan (23.8 ± 5.3) as well as to normative data reported by Fabricant (20.2 ± 7.2).<sup>40,49</sup>  
286 Further, the PFABS scores for the PLY group were nearly twice as high as those reported by  
287 high school athletes unable to play any sports in May 2020 (12.1 [11.7, 12.5]). Finally, the DNP  
288 group reported scores that were 25% and 45% lower than scores reported by Fabricant and  
289 Donovan, respectively.<sup>40,49</sup> This may indicate that by being able to play a sport, these athletes  
290 mitigated, to some degree, the low level of physical activity reported during the initial onset of  
291 the CoVID-19 pandemic.

292 Physical activity is known to have a beneficial effect on a wide range of health outcomes  
293 in adolescents, including sleep, academic success, well-being, and mental health.<sup>5,6,9,12,45-48,50</sup>  
294 Therefore, it is possible that the identified decrease in mental health in the DNP group may be  
295 at least partly due to the removal of the positive effects that physical activity has for  
296 adolescents. In addition, childhood obesity was a public health crisis before CoVID-19, and is  
297 projected to become worse due to the pandemic.<sup>19,21,51</sup> Decreased physical activity in  
298 adolescents may also have long-term negative effects and implications in terms of increased  
299 risk for obesity and cardiometabolic disease if these levels remain low for prolonged periods.<sup>52</sup>  
300 Chronically low levels of physical activity may also compound the mental health consequences

301 of the current crisis and increase the risk<sup>46,50</sup> Returning high school sport opportunities is a  
302 complex issue and requires careful consideration. Stakeholders should consider the promotion  
303 of physical activity for adolescents a top priority during the CoVID-19 pandemic.

#### 304 **Health Related Quality of Life**

305 HRQoL is a measurement of well-being, and well-being has been associated with self-perceived  
306 health, longevity, and healthy behaviors.<sup>53</sup> We found that adolescent athletes who had returned  
307 to sport in fall 2020 reported significantly higher HRQoL than those athletes unable to return to  
308 sport. This is consistent with prior studies that have shown that individuals with increased  
309 physical activity and/or interscholastic sport participation report higher HRQoL scores compared  
310 to inactive adolescents and high school non-athletes.<sup>54-57</sup> Therefore, it is not surprising that  
311 HRQoL scores for the PLY athletes were higher than the DNP athletes.

312 The total PedsQL scores reported here for the PLY athletes are significantly higher than  
313 scores (mean [95%CI]) reported by high school athletes when sports were cancelled (76.7,  
314 [76,0, 77.5]).<sup>24</sup> Further, the total PedsQL scores reported by the PLY athletes are similar to  
315 scores (mean  $\pm$  SD) recorded in 14 to 18 year-old athletes prior to the pandemic by Lam (89.4  $\pm$   
316 9.6 to 90.5  $\pm$  10.2), Snyder (89.5  $\pm$  10.1 to 93.6  $\pm$  7.6) and McGuine (90.9 [90.5,91.3])<sup>25,55,56</sup> The  
317 increased scores for the PLY group may also be attributed to aspects of sport participation  
318 beyond the opportunity for structured physical activity such as goal setting, emotional support  
319 and social interaction with teammates. This may suggest that by playing a sport, adolescents  
320 may be able to return to a “normal” or “expected” level of HRQoL similar to those recorded prior  
321 to the CoVID-19 pandemic.

322 On the other hand, the total PedsQL scores for the DNP athletes were lower than  
323 reported Peds QL scores in non-athletes (84.7  $\pm$  12.7 to 85.8  $\pm$  11.4) reported by Lam et. al.<sup>56</sup>  
324 Interestingly, the DNP scores are similar to scores reported in populations of youth age 5 – 18  
325 with chronic conditions such as asthma (74.8  $\pm$  16.5), cardiac disease (77.4  $\pm$  14.5) and  
326 diabetes (80.3 + 12.9) reported by Varni.<sup>58</sup> The reduced HRQoL in the DNP group may be due

327 in part to the decreased physical activity levels we noted previously. Since HRQoL is  
328 multifactorial, however, the scores reported by the DNP group are also likely impacted by other  
329 aspects of the lack of sport participation such as the continued loss of social interaction and loss  
330 of identity. Nonetheless, this difference persisted after controlling for school instructional  
331 delivery type, grade, sex, as well as the % of students eligible for free and reduced lunch,  
332 suggesting that the differences we noted may be attributable to the lack of sport participation  
333 itself. Further, the fact that the PLY group reported HRQoL similar to data collected prior to the  
334 pandemic may indicate that providing sport opportunities can positively impact multiple  
335 dimensions of adolescent health. Moving forward, validated health and well-being  
336 measurements provide a common metric for future studies to compare their results with our  
337 reported data.<sup>53</sup> These metrics may help policy makers with future decisions that may affect the  
338 health and well-being of student athletes in the coming months and years as we transition  
339 beyond the immediate impacts of the CoVID-19 pandemic.<sup>59-61</sup>

340

### 341 **Limitations**

342 This study has several limitations. First, the data provided were self-reported from online  
343 surveys and not the result of a clinical examination conducted by a health care provider.  
344 However, our findings are consistent with reports from experts and US Centers for Disease  
345 Control who have stated that CoVID-19 will impact the mental and physical health of  
346 youth.<sup>13,14,62</sup> Second, we acknowledge that there may be a response bias for participants. We  
347 cannot know for certain if the sample is representative of all the athletes at the schools or  
348 biased towards athletes who were more likely to respond if they experienced the most profound  
349 impacts on their health. Third, due to the survey delivery method, our sample may be biased  
350 towards athletes from higher socioeconomic groups with easy access to internet services.  
351 Fourth, we used the % of students eligible for free and reduced lunch for each school as a  
352 measure of economic status for individual respondents. However, we felt that this would be

353 more accurate as a measure of economic status rather than asking students to accurately report  
354 their household income. Finally, we recognize that mental health and overall well-being are  
355 complex and are potentially affected by other factors for which we were not able to account in  
356 our study and which could confound the results. Specifically, we did not ask the respondents  
357 whether they had any fears of contracting the CoVID-19 virus. Nonetheless, we were able to  
358 control for sex, age, and school instruction and the % of kids eligible for free or reduced lunch to  
359 help better define the impacts of sport participation during CoVID-19.

360

## 361 **CONCLUSION**

362 In this study, we found that adolescent athletes who were able to return to sport participation in  
363 fall 2020 reported dramatically lower symptoms of anxiety and depression, higher physical  
364 activity levels and higher HRQoL, even after adjusting for grade, sex, and the type of school  
365 instructional delivery. As we continue through the CoVID-19 pandemic, it is our hope that this  
366 information will help inform public health experts, school administrators, and sports medicine  
367 and mental health providers regarding the potential physical and mental health benefits  
368 associated with the participation in organized sports for adolescents. We recognize that  
369 returning to organized sports is a complex issue and requires careful consideration.

370 Nonetheless, research continues to suggest that sport participation during the CoVID-19  
371 pandemic is associated with significant mental and physical health benefits in adolescents.

372 **Word Count = 3927**

373

374

## 375 **Acknowledgements**

376 We gratefully acknowledge and thank all of the student athletes who participated in this study.

377

378 **REFERENCES**

- 379 1. Participation in school athletics. [https://www.childtrends.org/indicators/participation-in-](https://www.childtrends.org/indicators/participation-in-school-athletics)  
380 [school-athletics](https://www.childtrends.org/indicators/participation-in-school-athletics). Accessed July 12,2020.
- 381 2. Bailey R. Physical education and sport in schools: a review of benefits and outcomes.  
382 *Journal of School Health*. 2006;76(8):397-401. doi:10.1111/j.1746-1561.
- 383 3. Eime RM, Young JA, Harvey JT, Charity MJ, Payne WR. A systematic review of the  
384 psychological and social benefits of participation in sport for children and adolescents:  
385 informing development of a conceptual model of health through sport. *Int J Behav Nutr and*  
386 *Phys Acti*, 2013;10(1):98-104.
- 387 4. Gould D, Flett R, Lauer L. The relationship between psychosocial developmental and the  
388 sports climate experienced by underserved youth. *Psychology of Sport and Exercise*.  
389 2012;13(1):80.
- 390 5. Harrison PA, Narayan G. Differences in behavior, psychological factors, and environmental  
391 factors associated with participation in school sports and other activities in adolescence.  
392 *Journal of School Health* 2003;73(3):113-20.
- 393 6. Marques A, Ekelund U, Sardinha LB. Associations between organized sports participation  
394 and objectively measured physical activity, sedentary time and weight status in youth. *J Sci*  
395 *Med in Sport*. 2016;19(2):154-7.
- 396 7. Ashdown-Franks G, Sabiston CM, Solomon-Krakus S, O'Loughlin JL. Sport participation in  
397 high school and anxiety symptoms in young adulthood. *Mental Health and Phys Activity*.  
398 2017;12:19-24.
- 399 8. Dohle S, Wansink B. Fit in 50 years: participation in high school sports best predicts one's  
400 physical activity after Age 70. *BMC Public Health* 2013. [https://doi.org/10.1186/1471-2458-](https://doi.org/10.1186/1471-2458-13-110)  
401 [13-110](https://doi.org/10.1186/1471-2458-13-110).



- 402 9. Easterlin MC, et. al. Association of team sports participation with long-term mental health  
403 outcomes among individuals exposed to adverse childhood experiences. *JAMA Pediatr.*  
404 2019; 173 (7) 673- 681.
- 405 10. Khan KM, Thompson AM, Blair SN, Sallis JF, Powell KE, Bull FC, Bauman AE. Sport and  
406 exercise as contributors to the health of nations. *The Lancet.* 2012;380:59-64.
- 407 11. Kniffin KM, Wansink B, Shimizu M. Sports at work: Anticipated and persistent correlates of  
408 participation in high school athletics. *Journal of Leadership & Organizational Studies.*  
409 2015;22(2):217-30.
- 410 12. Troutman KP, Dufur MJ. From High School Jocks to College Grads: Assessing the Long-  
411 Term Effects of High School Sport Participation on Females' Educational Attainment. *Youth*  
412 *& Society.* 2007;38(4):443-462
- 413 13. Goldstein E, Wen H, Miller BF. Coronavirus Disease 2019 (COVID-19 ) and Mental Health  
414 for Children and Adolescents *JAMAPeds* Published Online: April 14,  
415 2020.doi:10.1001/jamapediatrics.2020.1456
- 416 14. Christakis. School Reopening—The Pandemic Issue That Is Not Getting Its Due Published.  
417 *JAMA Pediatr.* Published online May 13, 2020. doi:10.1001/ 2020.2068.
- 418 15. Lee. Mental health effects of school closures during COVID-19 . *Lancet Child Adolesc*  
419 *Health* 2020 Published Online April 14, 2020 [https://doi.org/10.1016/S2352-4642\(20\)30109-](https://doi.org/10.1016/S2352-4642(20)30109-7)  
420 7.
- 421 16. Czeisler ME, Lane R, Petrosky E. et al. Mental Health, Substance Use, and Suicidal  
422 Ideation During the COVID-19 Pandemic — United States, June 24–30, 2020. *MMWR Morb*  
423 *Mortal Wkly Rep* 2020;69:1049-1057.
- 424 17. Gassman-Pines A, Ananat EO, Fitz-Henley J. COVID-19 and Parent-Child Psychological  
425 Well-being. *Pediatrics.* 2020;146(4):e2020007294.
- 426 18. Rajapakse N, Dixit D. Human and novel coronavirus infections in children: a review.  
427 *Paediatrics and International Child Health.* 2020 Jun 26:1-20.

- 428 19. Ruopeng An, “Projecting the Impact of the coronavirus disease-2019 pandemic on  
429 childhood obesity in the United States: A microsimulation model. *Journal of Sport and*  
430 *Health Science*, 2020;9:302-312
- 431 20. Bazett-Jones DM, et al. “Impact of COVID-19 Social distancing Restrictions on Training  
432 Habits, Injury, and Care Seeking Behavior in Youth Long-Distance Runners.” *Frontiers in*  
433 *Sports and Active Living*. 2020;2
- 434 21. Browne NT, et al. “When Pandemics collide: the impact of COVID-19 on Childhood Obesity.”  
435 *Journal of Pediatric Nursing*. 2020.
- 436 22. Chen P, et al. “Returning Chinese school-aged children and adolescents to physical activity  
437 in the wake of COVID-19: actions and precautions.” *Journal of Sport and Health Science*.  
438 2020;23.
- 439 23. Pietrobelli A, et al. “Effects of COVID-19 Lockdown on Lifestyle behaviors in children with  
440 obesity living in Verona, Italy: a longitudinal study.” *Obesity*. 2020;28(8): 1382-1385
- 441 24. McGuine TA, Biese KM, Petrovska L, Hetzel SJ, Reardon C, Kliethermes S, Bell DR, Brooks  
442 A, Watson AM. The health of US adolescent athletes during CoVID-19 related school  
443 closures and sport cancellations. *Journal of Athletic Training*. 2020 Nov 5;  
444 <https://doi.org/10.4085/1062-6050-0478.20>.
- 445 25. McGuine TA, Biese KM, Petrovska L, Hetzel SJ, Reardon C, Kliethermes S, Bell DR, Brooks  
446 A, Watson AM. Changes in the Health of Adolescent Athletes: A Comparison of Health  
447 Measures Collected Before and During the CoVID-19 Pandemic. <https://MedRxiv>. Accessed  
448 1/7/20
- 449 26. White House.Gov. Opening up America. <https://www.whitehouse.gov/openingamerica/>.  
450 Accessed November 22, 2020
- 451 27. Center for Disease Control and Prevention Considerations for Youth Sports Administrators.  
452 <https://www.cdc.gov/coronavirus/2019-ncov/community/schools-childcare/youth-sports.html>.  
453 Accessed December 08, 2020.

- 454 28. National Federation of High School Associations. Guidance for State Associations to  
455 Consider in Re-opening High School Athletics and Other Activities.  
456 [https://www.nfhs.org/media/3812287/2020-nfhs-guidance-for-opening-up-high-school-](https://www.nfhs.org/media/3812287/2020-nfhs-guidance-for-opening-up-high-school-athletics-and-activities-nfhs-smac-may-15_2020-final.pdf)  
457 [athletics-and-activities-nfhs-smac-may-15\\_2020-final.pdf](https://www.nfhs.org/media/3812287/2020-nfhs-guidance-for-opening-up-high-school-athletics-and-activities-nfhs-smac-may-15_2020-final.pdf)) Accessed December 28, 2020.
- 458 29. National Federation of High School Associations. Sports Seasons Modifications Update.  
459 <https://www.nfhs.org/articles/sports-seasons-modifications-update/>. Accessed December 9,  
460 2020.
- 461 30. Fegert JM, Vitiello B, Plener PL, Clemens V. Challenges and burden of the Coronavirus  
462 2019 (COVID-19) pandemic for child and adolescent mental health: a narrative review to  
463 highlight clinical and research needs in the acute phase and the long return to normality.  
464 *Child and Adolescent Psychiatry and Mental Health*. 2020 Dec;14:1-1.
- 465 31. World Health Organization. Considerations for school-related public health measures in the  
466 context of COVID-19: annex to considerations in adjusting public health and social  
467 measures in the context of COVID-19, 14 September 2020. World Health Organization;  
468 2020.
- 469 32. Wisconsin Interscholastic Athletic Association. [https://www.wiaawi.org/News/bulletin-issue-](https://www.wiaawi.org/News/bulletin-issue-1-2020-21)  
470 [1-2020-21](https://www.wiaawi.org/News/bulletin-issue-1-2020-21). Accessed Nov 14, 2020
- 471 33. Wisconsin Interscholastic Athletic Association. Schools Declare for Fall Sport season .  
472 [https://www.wiaawi.org/Sports/Fall/Girls-Volleyball/News/schools-declare-for-fall-or-](https://www.wiaawi.org/Sports/Fall/Girls-Volleyball/News/schools-declare-for-fall-or-alternate-fall-season)  
473 [alternate-fall-season](https://www.wiaawi.org/Sports/Fall/Girls-Volleyball/News/schools-declare-for-fall-or-alternate-fall-season). Accessed Nov 14, 2020
- 474 34. Andrews JH, Cho E, Tugendrajch SK, et. al., Evidence-Based Assessment Tools for  
475 Common Mental Health Problems: A Practical Guide for School Settings. *Children &*  
476 *Schools*. 2020;42(1):41–52
- 477 35. Kroenke K, Wu J, Yu Z, Bair MJ, Kean J, Stump T, Monahan PO. Patient Health  
478 Questionnaire Anxiety and Depression Scale: Initial Validation in Three Clinical Trials.  
479 *Psychosom Med*. 2016;78(6):716-27.\

- 480 36. Mossman SA, Luft MJ, Schroeder HK, Varney ST, Fleck DE, Barzman DH, Gilman R,  
481 DelBello MP, Strawn JR. The Generalized Anxiety Disorder 7-item scale in adolescents with  
482 generalized anxiety. disorder: Signal detection and validation. *Ann Clin Psychiatry*.  
483 2017;29(4):227-234A.
- 484 37. Richardson LP, McCauley E, Grossman DC, et al. Evaluation of the Patient Health  
485 Questionnaire-9 Item for Detecting Major Depression Among Adolescents. *Pediatrics*.  
486 2010;126:1117–1123.
- 487 38. Kroenke K, Wu J, Yu Z, Bair MJ, Kean J, Stump T, Monahan PO. Patient Health  
488 Questionnaire Anxiety and Depression Scale: Initial Validation in Three Clinical Trials.  
489 *Psychosom Med*. 2016;78(6):716-27.
- 490 39. Fabricant PD, Robles A, Downey-Zayas T, et al. Development and validation of a pediatric  
491 sports activity rating scale: the Hospital for Special Surgery Pediatric Functional Activity Brief  
492 Scale (HSS Pedi-FABS). *Am J Sports Med*. 2013;41(10):2421-2429.
- 493 40. Fabricant PD, Suryavanshi JR, Calcei JG, Marx RG, Widmann RF, Green DW. The Hospital  
494 for Special Surgery Pediatric Functional Activity Brief Scale (HSS Pedi-FABS): Normative  
495 Data. *Am J Sports Med*. 2018;46(5):1228-1234
- 496 41. Varni JW, Seid M, Kurtin PS. PedsQL™ 4.0: Reliability and validity of the Pediatric Quality of  
497 Life Inventory™ Version 4.0 Generic Core Scales in healthy and patient populations. *Med*  
498 *Care*. 2001;39(8):800-812.
- 499 42. Varni JW, Burwinkle TM, Seid M, Skarr D. The PedsQL™\* 4.0 as a pediatric population  
500 health measure: feasibility, reliability, and validity. *Ambulatory Pediatrics*. 2003;3(6):329-  
501 341.
- 502 43. Wisconsin Department of Public Instruction. School nutrition program statistics.  
503 <https://dpi.wi.gov/school-nutrition/program-statistics>. Accessed 1/7/20

- 504 44. Singh S, Roy D, Sinha K, Parveen S, Sharma J, Joshi G. Impact of COVID-19 and lockdown  
505 on mental health of children and adolescents: A narrative review with recommendations,  
506 *Psychiatry Research* 2020; <https://doi.org/10.1016/j.psychres.2020.113429>.
- 507 45. Vella SA, Cliff DP, Magee CA, Okely AD. Associations between sports participation and  
508 psychological difficulties during childhood: a two-year follow up. *J Sci Med Sport*. 2015;  
509 1;18(3):304-9.
- 510 46. Biddle SJ, Ciaccioni S, Thomas G, Vergeer I. Physical activity and mental health in children  
511 and adolescents: An updated review of reviews and an analysis of causality. *Psychology of*  
512 *Sport and Exercise*. 2019 May 1;42:146-55.
- 513 47. Punit N. Matta, Tithi D. Baul, Krystel Loubeau, Jennifer Sikov, Natalie Plasencia, Ying Sun,  
514 Andrea E. Spencer. Low sports participation is associated with withdrawn and depressed  
515 symptoms in urban, school-age children. *Journal of Affective Disorders*. 2021; 280, Part B:  
516 24-29.
- 517 48. Vella SA. Mental health and organized youth sport. *Kinesiology Review*. 2019 Aug  
518 1;8(3):229-36.
- 519 49. Donovan L, Hetzel S, Laufenberg CR & McGuine TA. Prevalence and Impact of Chronic  
520 Ankle Instability in Adolescent Athletes. *Orthop J Sports Med*. Feb. 2020.  
521 17;8(2):2325967119900962.
- 522 50. Valkenborghs SR, Noetel M, Hillman CH, Nilsson M, Smith JJ, Ortega FB, Lubans DR. The  
523 impact of physical activity on brain structure and function in youth: A systematic review.  
524 *Pediatrics*. 2019 Oct 1;144(4):e20184032.
- 525 51. Skinner AC, Ravanbakht SN, Skelton JA, Perrin EM, Armstrong SC. Prevalence of obesity  
526 and severe obesity in US children, 1999–2016. *Pediatrics*. 2018 Mar 1;141(3).
- 527 52. Telama R, Yang X, Viikari J, Välimäki I, Wanne O, Raitakari O. Physical activity from  
528 childhood to adulthood: a 21-year tracking study. *Am J Prev Med*. 2005;28(3):267-273.

- 529 53. US Center for Disease Control, Health–Related Quality of Life  
530 <https://www.cdc.gov/hrqol/wellbeing.htm>. Accessed: 12/3/20.
- 531 54. Houston MN, Hoch MC, Hoch JM. Health-related quality of life in athletes: a systematic  
532 review with meta-analysis. *J Ath Train*. 2016;51(6):442-53.
- 533 55. Snyder AR, Martinez JC, Bay RC, Parsons JT, Sauers EL, Valovich McLeod TC. Health-  
534 related quality of life differs between adolescent athletes and adolescent nonathletes. *J*  
535 *Sport Rehabil*. 2010;19(3): 237–248.
- 536 56. Lam KC, Valier AR, Bay RC, McLeod TC. A unique patient population? Health-related  
537 quality of life in adolescent athletes versus general, healthy adolescent individuals. *J Ath*  
538 *Train*. 2013;48(2):233-41.
- 539 57. Snyder Valier AR, Welch Bacon CE, Bay RC, Molzen E, Lam KC, Valovich McLeod TC.  
540 Reference Values for the Pediatric Quality of Life Inventory and the Multidimensional  
541 Fatigue Scale in Adolescent Athletes by Sport and Sex. *Am J Sports Med*.  
542 2017;45(12):2723-2729.
- 543 58. Varni J., Limbers CA. & Burwinkle TM. Impaired health-related quality of life in children and  
544 adolescents with chronic conditions: a comparative analysis of 10 disease clusters and 33  
545 disease categories/severities utilizing the PedsQL™ 4.0 Generic Core Scales. *Health Qual*  
546 *Life Outcomes* **5**, 43 (2007). <https://doi.org/10.1186/1477-7525-5-43>.
- 547 59. Ghosh R, Dubey MJ, Chatterjee S, Dubey S. Impact of COVID-19 on children: Special focus  
548 on psychosocial aspect. *Education*. 2020;31:34.
- 549 60. Watson A, Koontz J. Youth sports in the wake of COVID-19: a call for change. *Br J Sports*  
550 *Med*. 2020 [doi.org/10.1136/bjsports-2020-103288](https://doi.org/10.1136/bjsports-2020-103288).
- 551 61. Kelly AL, Erickson K, Pierce S, Turnnidge J. Youth sport and COVID-19: contextual,  
552 methodological, and practical considerations. *Frontiers in Sports and Active Living*, 2020 (2)  
553 PMC7739668.

554 62. US Centers for Disease Control. Mental Health, Substance Use, and Suicidal Ideation  
555 During the COVID-19 Pandemic — United States, June 24–30, 2020. *Morbidity and*  
556 *Mortality Weekly Report*. <https://www.cdc.gov/mmwr/volumes/69/wr/mm6932a1.htm>.  
557 Accessed 11/20/21  
558

559 **Title:** High School Sports During the CoVID19 Pandemic: The Impact of High School Sports on  
560 the Health of Student Athletes.

561

## 562 **List of Figures and Tables**

563

564 **Table 1.** Participant Characteristics for Adolescent Athletes Who Did or Did Not Play a High  
565 School Sport in the Fall 2020

566

567 **Table 2.** Comparison of Anxiety, Depression, Physical Activity and Quality of Life  
568 Scores for Adolescent Athletes Who Did or Did Not Play a High School Sport in the Fall  
569 2020

570

571 **Figure 1.** Prevalence of Anxiety Symptoms for Adolescent Athletes Who Did or Did Not  
572 Play a High School Sport in the Fall 2020

573

574 **Figure 2.** Prevalence of Depression Symptoms for Adolescent Athletes Who Did or Did  
575 Not Play a High School Sport in the Fall 2020

576



577 **Table 1. Participant Characteristics for Adolescent Athletes Who Did or Did Not Play a**  
 578 **High School Sport in the Fall 2020**

| Variable                                             | All Participants<br>(N = 559) | Did Not<br>Play a Fall Sport<br>(n = 388) | Did<br>Play a Fall Sport<br>(n = 171) | P-value |
|------------------------------------------------------|-------------------------------|-------------------------------------------|---------------------------------------|---------|
| <b>Age</b>                                           | 15.7 (1.2)                    | 15.7 (1.2)                                | 15.7 (1.2)                            | 0.895   |
| <b>Sex</b>                                           |                               |                                           |                                       | < 0.001 |
| Female                                               | 244 (43.6%)                   | 151 (39.0%)                               | 93 (54.7%)                            |         |
| Male                                                 | 313 (56.3%)                   | 236 (61.0%)                               | 77 (45.3%)                            |         |
| <b>Grade</b>                                         |                               |                                           |                                       | 0.173   |
| 9                                                    | 130 (23.3%)                   | 90 (23.2%)                                | 40 (23.4%)                            |         |
| 10                                                   | 167 (29.9%)                   | 116 (29.9%)                               | 51 (29.8%)                            |         |
| 11                                                   | 145 (25.9%)                   | 109 (28.1%)                               | 36 (21.1%)                            |         |
| 12                                                   | 117 (20.9%)                   | 73 (18.8%)                                | 44 (25.7%)                            |         |
| <b>Schools</b>                                       | 44                            | 23                                        | 25                                    | --      |
| <b>Instructional delivery method</b>                 |                               |                                           |                                       | < 0.001 |
| Online                                               | 374 (66.9%)                   | 355 (91.4%)                               | 19 (11.1%)                            |         |
| Hybrid (in person and online)                        | 113 (20.2%)                   | 30 (7.7%)                                 | 83 (48.5%)                            |         |
| In person                                            | 72 (12.8)                     | 3 (0.8%)                                  | 69 (40.3%)                            |         |
| <b>% Students eligible for free or reduced lunch</b> | 25.9 (10.3)                   | 22.9 (7.0)                                | 34.0 (13.3)                           | < 0.001 |
| <b>Planned Fall Sport Participation</b>              |                               |                                           |                                       |         |
| Cheer / Dance                                        | 23 (4.1%)                     | 20 (5.2%)                                 | 3 (1.8%)                              |         |
| Cross Country                                        | 41 (7.3%)                     | 25 (6.4%)                                 | 16 (9.4%)                             |         |
| Football                                             | 213 (38.1%)                   | 160 (41.2%)                               | 53 (31.0%)                            |         |
| Soccer (boys)                                        | 53 (9.5%)                     | 31 (8.0%)                                 | 22 (12.9%)                            |         |
| Swim (girls)                                         | 20 (3.6%)                     | 19 (4.9%)                                 | 1 (0.6%)                              |         |
| Tennis (girls)                                       | 13 (2.3%)                     | 3 (0.8%)                                  | 10 (5.8%)                             |         |
| Volleyball                                           | 117 (20.9%)                   | 51 (13.1%)                                | 66 (38.6%)                            |         |
| None                                                 | 79 (14.1%)                    | 79 (20.4%)                                | 0 (0.0%)                              |         |
| <b>Planned Winter or Spring Sport Participation</b>  |                               |                                           |                                       |         |
| Baseball                                             | 103 (18.4%)                   | 72 (18.6%)                                | 31 (18.1%)                            |         |
| Ice Hockey                                           | 22 (3.9%)                     | 18 (4.6%)                                 | 4 (2.3%)                              |         |
| Lacrosse                                             | 32 (5.7%)                     | 32 (8.2%)                                 | 0 (0.0%)                              |         |
| Soccer (girls)                                       | 205 (36.7%)                   | 123 (31.7%)                               | 82 (48.0%)                            |         |
| Softball                                             | 66 (11.8%)                    | 33 (8.5%)                                 | 33 (19.3%)                            |         |
| Swim (boys)                                          | 4 (0.7%)                      | 3 (0.8%)                                  | 1 (0.6%)                              |         |
| Tennis (boys)                                        | 7 (1.3%)                      | 7 (1.8%)                                  | 0 (0.0%)                              |         |
| Track                                                | 120 (21.5%)                   | 72 (18.6%)                                | 48 (28.1%)                            |         |
| Wrestling                                            | 35 (6.3%)                     | 27 (7.0%)                                 | 8 (4.7%)                              |         |
| Other sport^                                         | 24 (4.3%)                     | 21 (5.4%)                                 | 3 (1.8%)                              |         |

579 ^ Other sport includes: Bowling, Gymnastics, Rugby, Power lifting, Skiing (alpine and downhill).

580 **Table 2. Comparison of Anxiety, Depression, Physical Activity and Quality of Life Scores**  
581 **for Adolescent Athletes Who Did or Did Not Play a High School Sport in the Fall 2020**

| Variable                   | All Participants<br>(N = 559) | Did Not Play a Fall<br>Sport (n=388) | Did Play a Fall<br>Sport<br>(n=171) | P-value |
|----------------------------|-------------------------------|--------------------------------------|-------------------------------------|---------|
| <b>GAD-7 Total Score</b>   | 6.5 (5.8, 7.2)                | 8.4 (7.2, 9.5)                       | 3.2 (2.2, 4.3)                      | < 0.001 |
| <b>PHQ-9 Total Score</b>   | 6.3 (5.6, 7.1)                | 7.6 (6.4, 8.8)                       | 3.9 (2.8, 4.9)                      | < 0.001 |
| <b>PFABS Total Score</b>   | 18.7 (17.9, 19.6)             | 16.4 (15.0, 17.8)                    | 23.2 (22.0, 24.5)                   | < 0.001 |
| <b>PedsQL Score</b>        |                               |                                      |                                     |         |
| Physical Summary Score     | 88.4 (86.9, 89.9)             | 86.5 (84.1, 88.9)                    | 92.3 (90.1, 94.4)                   | 0.004   |
| Psychosocial Summary Score | 79.5 (77.5, 81.6)             | 75.9 (72.5, 79.3)                    | 86.4 (83.3, 89.4)                   | < 0.001 |
| Total Score                | 82.6 (80.9, 84.3)             | 79.6 (76.8, 82.4)                    | 88.4 (85.9, 90.9)                   | < 0.001 |

582  
583 Reported as mean (SD), N (%), or estimated mean (95% CI) when controlling for Age, Sex, Teaching  
584 delivery (in person, online or hybrid) method, and school % eligible for free or reduced lunch percentage.  
585  
586

587 **Figure 1.** Prevalence of Anxiety Symptoms for Adolescent Athletes Who Did or Did Not  
588 Play a High School Sport in the Fall 2020

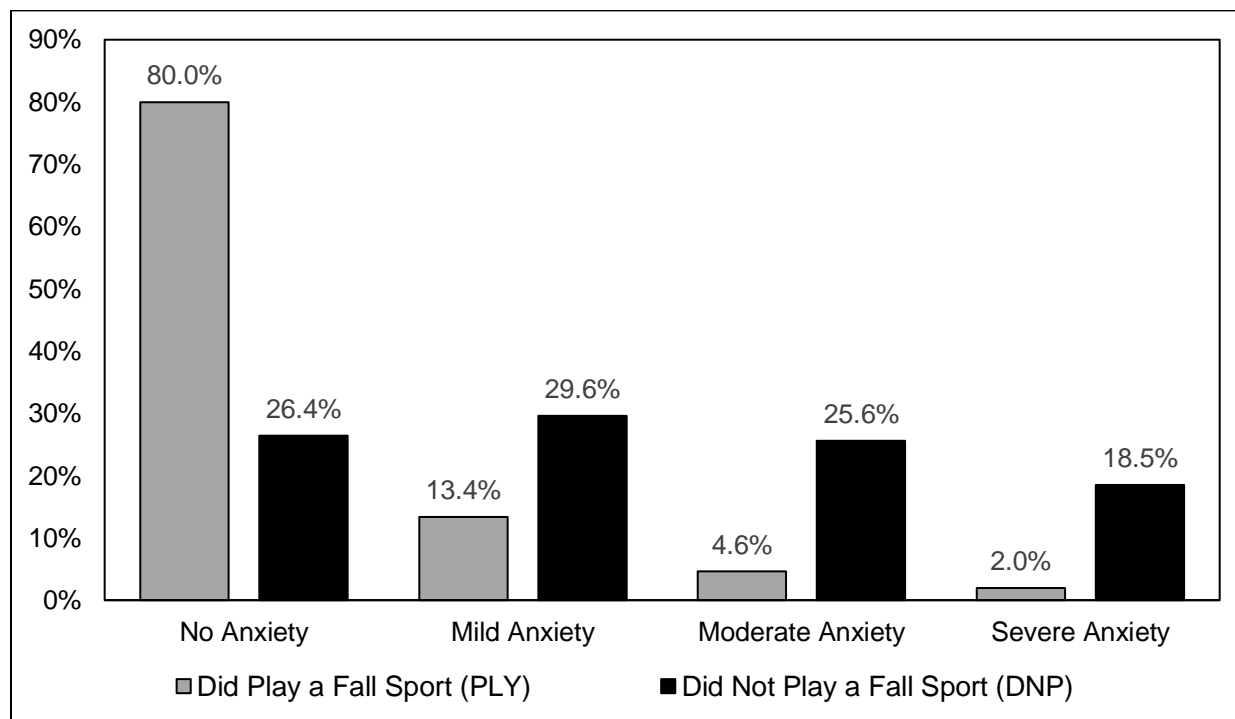

589  
590 GAD-7 category percentages were estimated when controlling for age, sex teaching  
591 delivery method and school % of students eligible for free and reduced lunch.  
592

593  
594

595 **Figure 2.** Prevalence of Depression Symptoms for Adolescent Athletes Who Did or Did  
596 Not Play a High School Sport in the Fall 2020

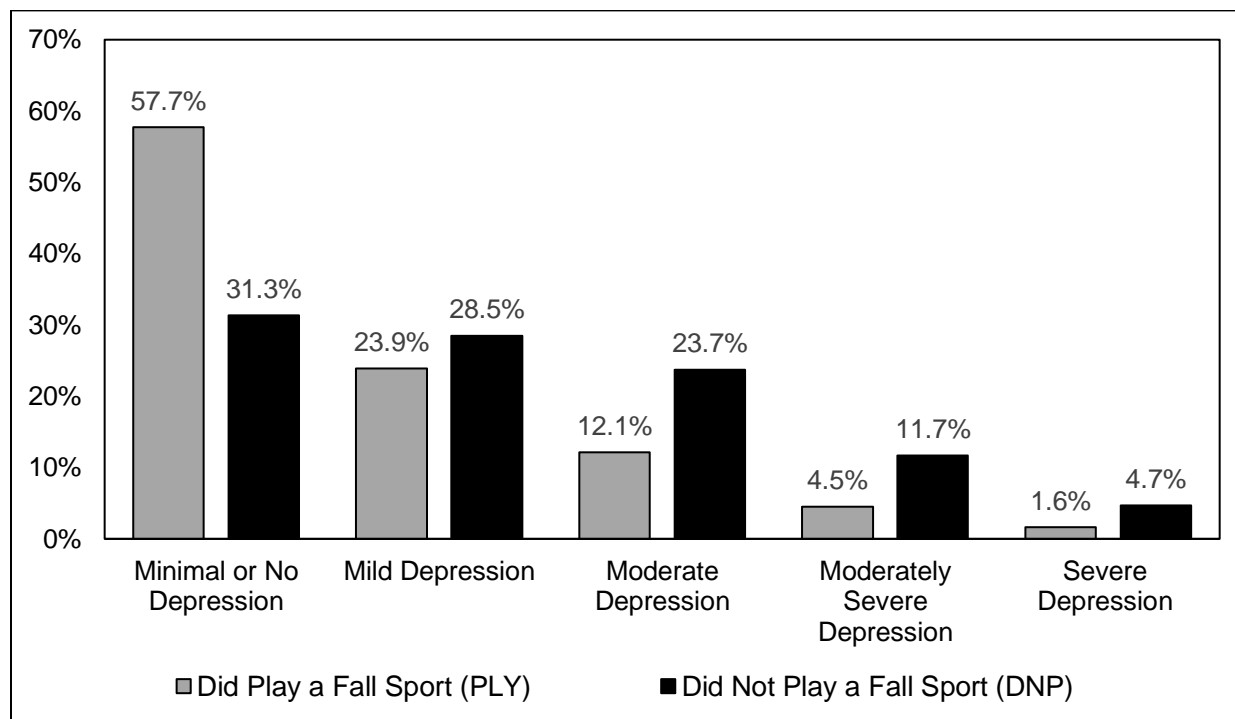

597  
598 PHQ9 category percentages were estimated when controlling for age, sex teaching  
599 delivery method and school % of students eligible for free and reduced lunch.
